# Supplementary material
Source: publisher site journal article supplement (http://www.degruyter.com/publication/journal_key/TJJ/downloadAsset/TJJ_SIMPLIFIED%20INSTRUCTIONS%20FOR%20AUTHORS.pdf)
Supplement: Supplementary file 1 [file TJJ_SIMPLIFIED%20INSTRUCTIONS%20FOR%20AUTHORS.pdf]

## SIMPLIFIED INSTRUCTIONS FOR AUTHORS

- Each article must begin with an abstract of less than 150 words. The abstract must be followed by an appropriate classification according to PACS 2010 (Physics and Astronomy Classification Scheme) and a list of 3 to 6 keywords. The short title for the running head should contain at most 80 characters, spaces inclusive
- Please use only SI units in the text
- Figures must be of sufficiently high resolution (minimum 600 dpi). Authors are encouraged to submit illustrations in color if necessary for their scientific content
- Publication of color figures is provided free of charge both in online and print editions
- References should be collected at the end of the paper, numbered with Arabic numerals in alphabetical order of the authors' names and surrounded by square brackets. Please use abbreviations for titles of journals in accordance with those listed in the "World List of Scientific Periodicals" (Butterworth London)
- The postal and electronic addresses of all authors should be placed at the very end of the paper
- Authors using **LaTeX** are asked to follow a few basic guidelines while formatting their paper for publication, in order for the journal to be as homogeneous in appearance as possible, and to be as flexible as possible with regards to all macro packages. Please download the class file and the respective sample file including the instructions for formatting. [Click here to download the De Gruyter LaTeX Template](#)
- Authors using **Word** are requested to prepare their manuscript due to the following guidelines:
  - (1) Make use of Word templates/styles to help ensure consistency in your manuscript! It doesn't matter which kind of templates you use — as long as you avoid formatting by hand, e.g., you could use the style "Heading 1" for section headings rather than choosing the font, color, paragraph spacing etc., individually.
  - (2) You may also define your own styles, e.g., to typewrite the variable  $x$  within the text, you may either use the Equation Editor or create an appropriate style "math italic". Both options ensure that the formatting attribute italic remains after the publisher's conversion and final typesetting.
  - (3) Use the Equation Editor for both inline and displayed formulas. See (2) for exceptions.
  - (4) Settings for the paper, margins, fonts, etc., can be chosen arbitrarily.

Final formatting is however made by the Publisher. So please keep formatting macros to a minimum to make conversion of files more accurate.
